# Supplementary material for: Physics and physiology determine strategies of bacterial investment in flagellar motility
Source: Research Square preprint supplement (doi:10.21203/rs.3.rs-4044856/v1), 2024-04-18
Supplement: Supplementary file 1 [file e32df38d9e5d9a3855049da3.xlsx]

## Sheet: Supplementary Table 1
Strains
Description	Name	Source or reference	Comments
Escherichia coli MG1655Δflu	VS1671	Ni et al, 2020. PNAS1	Used as the wild-type strain (WT) in our study. Deletion of the flu gene that encodes the major E. coli adhesin, antigen 43, prevents autoaggregation of motile planktonic cells, thus facilitating subsequent characterization of motility.
MG1655Δflu::FLP-lacI-Ptac-flhDC	VS1683	Ni et al, 2020. PNAS1	Strain with the synthetic IPTG-inducible regulation of flagellar regulon (Ptac)
W3110	VS306	Hayashi et al, 2006. Mol Syst Biol2	One of the canonical K-12 derivatives
RP437	VS278	Parkinson, 1978. J. Bacteriol3	Canonical E. coli strain for chemotaxis
MG1655Δflu::FLPΔydiV::FLP	IL160	This study	Constructed via P1 transduction from KEIO collection followed by FLP recombination
MG1655Δflu::FLPΔflhC::FLP	VS1674	Ni et al, 2020. PNAS1	Non-motile strain used in the pairwise competition assays
MG1655Δflu::FLPΔcheY::FLP	VS1672	Ni et al, 2020. PNAS1	Motile and non-chemotactic strain used in the pairwise competition assays
Plasmids
PfliC-GFP	pVS1157	Ni et al, 2020. PNAS1	GFP reporter for fliC promoter activity based on pUA66 plasmid. sc101 Ori, KanR
pTrc99a backbone	pVS2232	Amann and Brosius, 1985. Gene4	Empty vector. pBR322 ori, AmpR
pTrc99a-CFP	pVS129	Press et al, 2013. PLOS Genetics5	pTrc99a-based construct for the IPTG-inducible expression of CFP protein
pTrc99a-YFP	pVS132	Oleksiuk et al, 2011. Cell	pTrc99a-based construct for the IPTG-inducible expression of YFP protein
References:
1. Ni, B., Colin, R., Link, H., Endres, R.G. & Sourjik, V. Growth-rate dependent resource investment in bacterial motile behavior quantitatively follows potential benefit of chemotaxis. Proc Natl Acad Sci U S A 117, 595-601 (2020).
2. Hayashi, K. et al. Highly accurate genome sequences of Escherichia coli K-12 strains MG1655 and W3110. Mol Syst Biol 2, 2006 0007 (2006).
3. Parkinson, J.S. Complementation analysis and deletion mapping of Escherichia coli mutants defective in chemotaxis. Journal of Bacteriology 135, 45-53 (1978).
4. Amann, E., & Brosius, J. (1985). "ATG vectors' for regulated high-level expression of cloned genes in Escherichia coli. Gene, 40(2-3), 183–190.
5. Press MO, Li H, Creanza N, Kramer G, Queitsch C, et al. (2013) Genome-scale Co-evolutionary Inference Identifies Functions and Clients of Bacterial Hsp90. PLOS Genetics 9(7): e1003631.
6. Oleksiuk, O., Jakovljevic, V., Vladimirov, N., Carvalho, R., Paster, E., Ryu, W. S., Meir, Y., Wingreen, N. S., Kollmann, M., & Sourjik, V. (2011). Thermal robustness of signaling in bacterial chemotaxis. Cell, 145(2), 312–321.

## Sheet: Supplementary Table 2
Strain	Host	Phylogroup	Sensitivity to kanamycin2	Spreading rank3	Isolates used for furtner experiments	Swimming (L) ≈ Swimming (S) (good/poor)4	Swimming (S) > swimming (L)	Expression (S) > Expression (L)
1	Human (F)1	A		no
2	Human (M)	A	KanR
3	Dog	A		no
4	Human(F)	A		good	û		û	û
5	Human (F)	A		no
6	Human(M)	A		poor	û	û
7	Orangutan	B1		good	û		û
8	Human (F)	A	KanR
9	Human (F)	A		no
10	Human(F)	A		good	û	û
11	Human(F), UTI	A		good	û
12	Human(F)	A		moderate	û		û
13	Human(F)	A		good	û	û
14	Human(F), UTI	A		good	û	û
15	Human(F)	A		no
16	Leopard	A		moderate	û
17	Pig	A		no
18	Celebese ape	A	KanR
19	Celebese ape	A	KanR
20	Steer	A		poor
21	Steer	A		no
22	Steer	A		good	û	û
23	Elephant	A		no
24	Human(F)	A		modderate	û	û
25	Dog	A		no
26	Human(infant)	B1		good	û		û
27	Giraffe	B1		poor
28	Human(F)	B1		no
29	Kangaroo rat	B1		good	û
30	Bison	B1		good	û		û
31	Leopard	D	KanR
32	Giraffe	B1		poor
33	Sheep	B1		good	û
34	Dog	B1	KanR
35	Human (M)	D		no
36	Human (F)	D		no
37	Marmoset	D	KanR
38	Human(F)	D		good	û
39	Human(F)	D		no
40	Human(F), UTI	D		poor
41	Human (M)	D		poor
42	Human(M)	D		good	û
43	Human(F)	A		moderate
44	Coguar	D		moderate	û
45	Pig	B1		good	û	û
46	Celebese ape	D		no
47	Sheep	D		poor
48	Human(F), UTI	D		moderate	û	û
49	Human(F)	D		moderate
50	Human(F), UTI	D		no
51	Human(infant)	B2		good	û	û
52	Orangutan	B2		no
53	Human(F)	B2		poor
54	Human	B2		poor
55	Human(F)	B2	KanR
56	Human(F), UTI	B2	KanR
57	Gorilla	B2		good	û
58	Lion	B1		good	û
59	Human (M)	B2		no
60	Human(F), UTI	B2		no
61	Human(F)	B2	KanR
62	Human(F), UTI	B2		no
63	Human(F)	B2		no
64	Human(F), UTI	B2		poor
65	Celebese ape	B2	KanR
66	Celebese ape	B1		poor
67	Goat	B1		poor
68	Giraffe	B1		poor
69	Celebese ape	B1		no
70	Gorilla	A		no
71	Human(F), UTI	A		no
72	Human(F), UTI	A		good	û		û	û
1:(M) - male, (F) - female, UTI - urinary tract infection. Description is taken from Ochman, H. & Selander, R.K. Standard reference strains of Escherichia coli from natural populations. Journal of Bacteriology 157, 690-693 (1984).
2: KanR- the strains which grew on the LB agar + Kan (50 µg/mL)
3: Assessed as the diameter of the spreading zone in soft TB agar (0.27% TB agar)
4: Swimming velocity measured after growth in liquid (L) or on the semi-solid medium (S); good - > 10 μm/sec, poor - < 10 μm/sec
